# Supplementary material for: Baccharis trimera Infusion Reduces Macrophages Activation and High-Fat Diet-Induced Metabolic Disorders in Mice
Source: MDPI journal article supplement (doi:10.3390/ph15101258), 2022-10-13
Supplement: s1 [file s1]

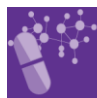

## SUPPLEMENTARY MATERIAL

***Baccharis trimera* Infusion Reduces Macrophages Activation and High-Fat Diet-Induced Metabolic Disorders in Mice**

Thalita Vieira Nascimento Ximenes<sup>1</sup>, Raquel Carvalho<sup>1</sup>, Iluska Senna Bonfá<sup>1</sup>, Vanessa Samúdio Santos<sup>1</sup>, Luciane Candeloro<sup>2</sup>, Flávio Macedo Alves<sup>2</sup>, Denise Brentan Silva<sup>1</sup>, Carlos Alexandre Carollo<sup>1</sup>, Karine de Cássia Freitas Gielow<sup>1</sup>, Saulo Euclides Silva-Filho<sup>1</sup> and Mônica Cristina Toffoli-Kadri<sup>1\*</sup>

<sup>1</sup> Pharmaceutical Sciences, Food and Nutrition College, Federal University of Mato Grosso do Sul, Campo Grande 79070-900, Brazil

<sup>2</sup> Biosciences Institute, Federal University of Mato Grosso do Sul, Campo Grande 79070-900, Brazil

\* Correspondence: monica.kadri@ufms.br

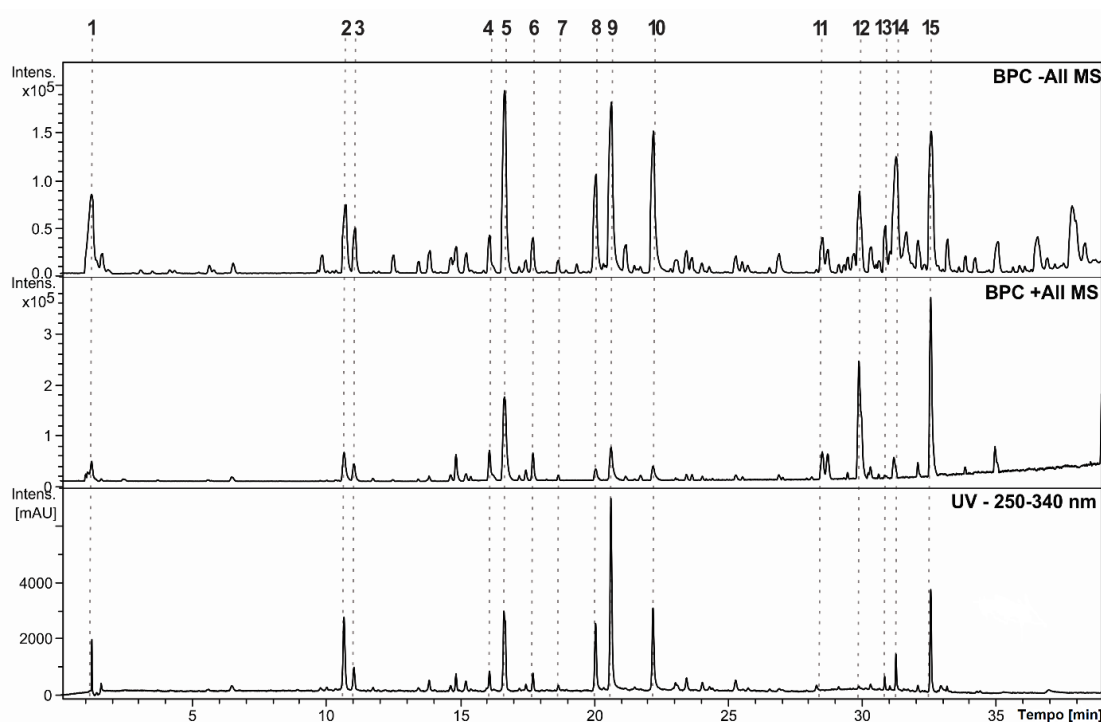

**Figure S1.** Chromatographic profile of the infusion of *Baccharis trimera*.

**Table S1.** Composition of the experimental diets.

|                             | <b>Diet AIN-93M<br/>(Normolipid)</b> | <b>High-fat Diet</b> |
|-----------------------------|--------------------------------------|----------------------|
| <b>Ingredients (g / kg)</b> |                                      |                      |
| Starch                      | 620.7                                | 308.7                |
| Casein                      | 140                                  | 140                  |
| Sucrose                     | 100                                  | 100                  |
| Soybean oil                 | 40                                   | 40                   |
| Cellulose                   | 50                                   | 50                   |
| Mineral Mix AIN 93          | 35                                   | 35                   |
| Vitamin Mix AIN 93          | 10                                   | 10                   |
| L-Cystine                   | 1.8                                  | 1.8                  |
| Choline                     | 2.5                                  | 2.5                  |
| BHT                         | 0.008                                | 0.008                |
| Lard                        | -                                    | 312.0                |
| <b>Energy (Kj / kg)</b>     | <b>15940.9</b>                       | <b>21421.2</b>       |
| Carbohydrates (%)           | 75.81                                | 31.93                |
| Proteins (%)                | 14.73                                | 10.94                |
| Lipids (%)                  | 9.47                                 | 57.13                |
| <b>Kj / g</b>               | <b>15.90</b>                         | <b>21.42</b>         |
